# Supplementary material
Source: PubMed Central journal article supplement (PMC7960295)
Supplement: 15-00913.pdf [file 15-00913.pdf]

**On-line Table: Performance of sagittal STIR, FSE T2, and PSIR**

|                                      | Cervical Cord       |                     |                     | Thoracic Cord       |                     |                     |
|--------------------------------------|---------------------|---------------------|---------------------|---------------------|---------------------|---------------------|
|                                      | STIR                | FSE T2              | PSIR                | STIR                | FSE T2              | PSIR                |
| False-positive cord segments         | 2                   | 1                   | 4                   | 13                  | 12                  | 5                   |
| False-negative cord segments         | 11                  | 52                  | 4                   | 8                   | 36                  | 63                  |
| True-positive cord segments          | 95                  | 54                  | 102                 | 120                 | 92                  | 65                  |
| True-negative cord segments          | 74                  | 75                  | 72                  | 175                 | 176                 | 183                 |
| Sensitivity (95% CI)                 | 89.6% (82.4%–94.1%) | 50.9% (41.6%–60.3%) | 96.2% (90.7%–98.5%) | 93.8% (88.2%–96.8%) | 71.9% (63.5%–78.9%) | 50.8% (4.22%–5.93%) |
| Specificity (95% CI)                 | 94.7% (90.9%–99.3%) | 98.7% (92.9%–99.8%) | 94.7% (87.2%–97.9%) | 93.1% (88.5%–95.9%) | 93.6% (89.2%–96.3%) | 97.3% (93.9%–98.9%) |
| Accuracy                             | 0.929               | 0.709               | 0.956               | 0.934               | 0.848               | 0.785               |
| Interobserver agreement ( $\kappa$ ) | 0.86                | 0.67                | 0.64                | 0.69                | 0.56                | 0.59                |
